# Supplementary material
Source: PubMed Central journal article supplement (PMC4604176)

## SUPPLEMENTARY DATA

### **Effect of readthrough treatment in fibroblasts of patients affected with lysosomal diseases caused by premature termination codons.**

Leslie Matalonga\*, Ángela Arias\*, Frederic Tort\*, Xènia Ferrer-Cortés\*, Judit Garcia-Villoria\*, Maria Josep Coll\*, Laura Gort\*, Antonia Ribes\*.

\*Secció d'Errors Congènits del Metabolisme-IBC, Servei de Bioquímica i Genètica Molecular, Hospital Clínic, IDIBAPS; CIBER de Enfermedades Raras (CIBERER), Barcelona, Spain.

## **SUPPLEMENTARY FIGURE LEGENDS:**

**Supplementary Figure 1. Preliminary studies, testing gentamicin and PTC124 concentration, incubation time and monitoring cell viability in fibroblasts derived from P1 (Niemann-Pick AB), P5 (Sanfilippo B), P6 (Sanfilippo B) and a healthy individual.** Monitoring of the residual enzymatic activities after gentamicin treatment during 24h, 48h and 72h (A) and PTC124 during 16h, 24h (B), 48h and 72h (C). Monitoring of the cell viability of P6 and a healthy individual after gentamicin (D) and PTC124 (E,F).

NPAB: Niemann-Pick AB disease, SF: Sanfilippo B disease.

A

24 hours

Patient 1

(P1), NPAB\_24 hours

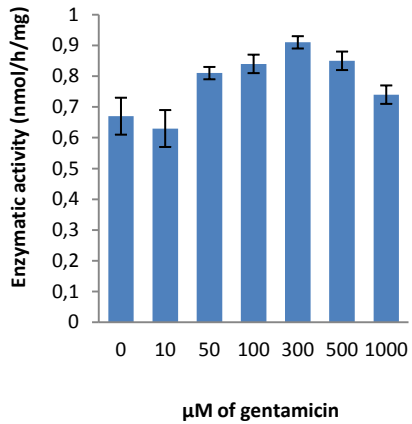

Patient 5

(P5), SF\_24 hours

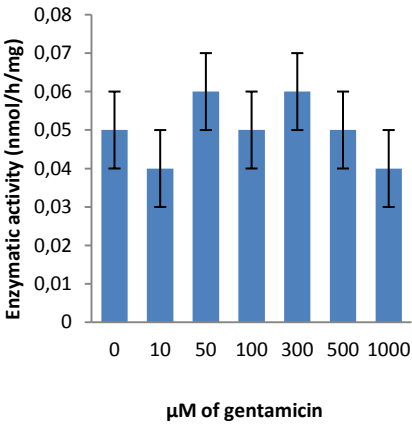

Patient 6

(P6), SF\_24 hours

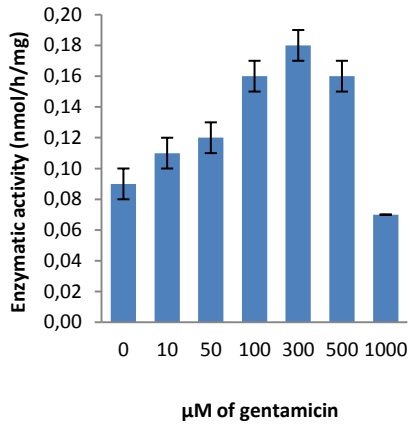

48 hours

(P1), NPAB\_48 hours

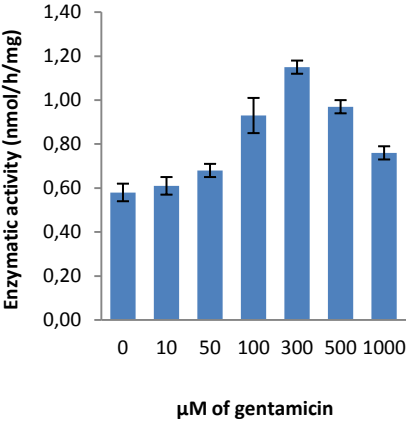

(P5), SF\_48 hours

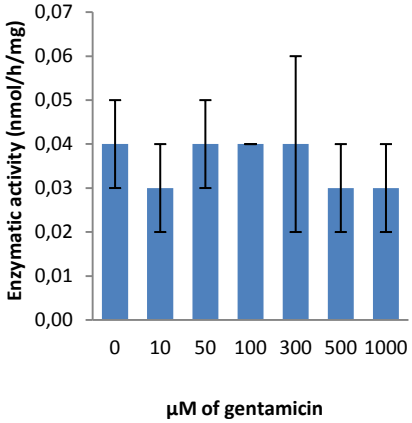

(P6), SF\_48 hours

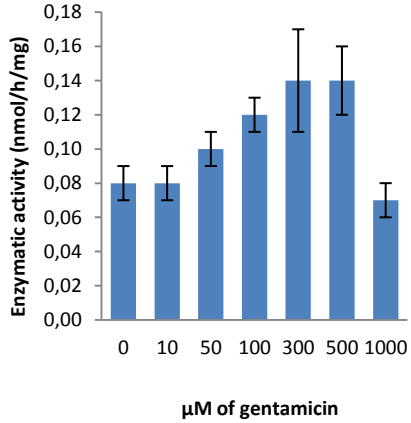

72 hours

(P1), NPAB\_72 hours

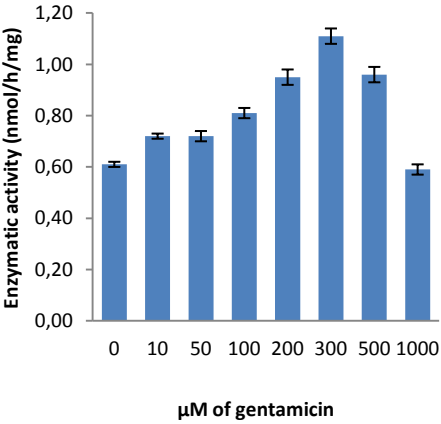

(P5), SF\_72 hours

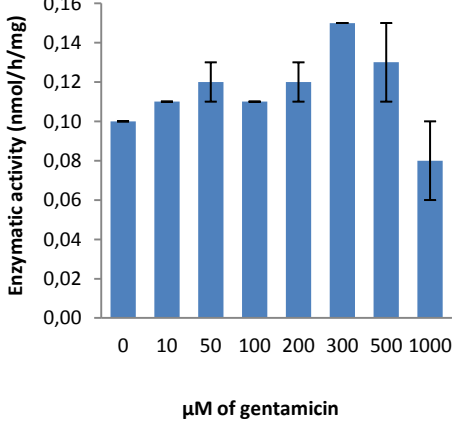

(P6), SF\_72 hours

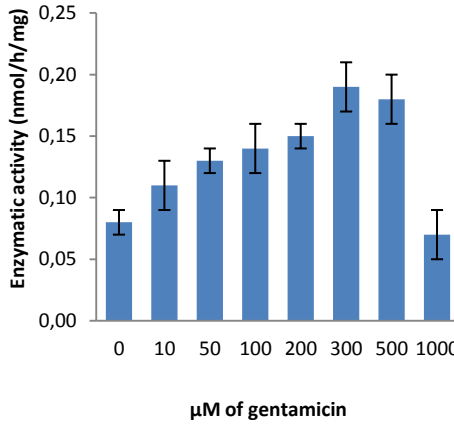

B

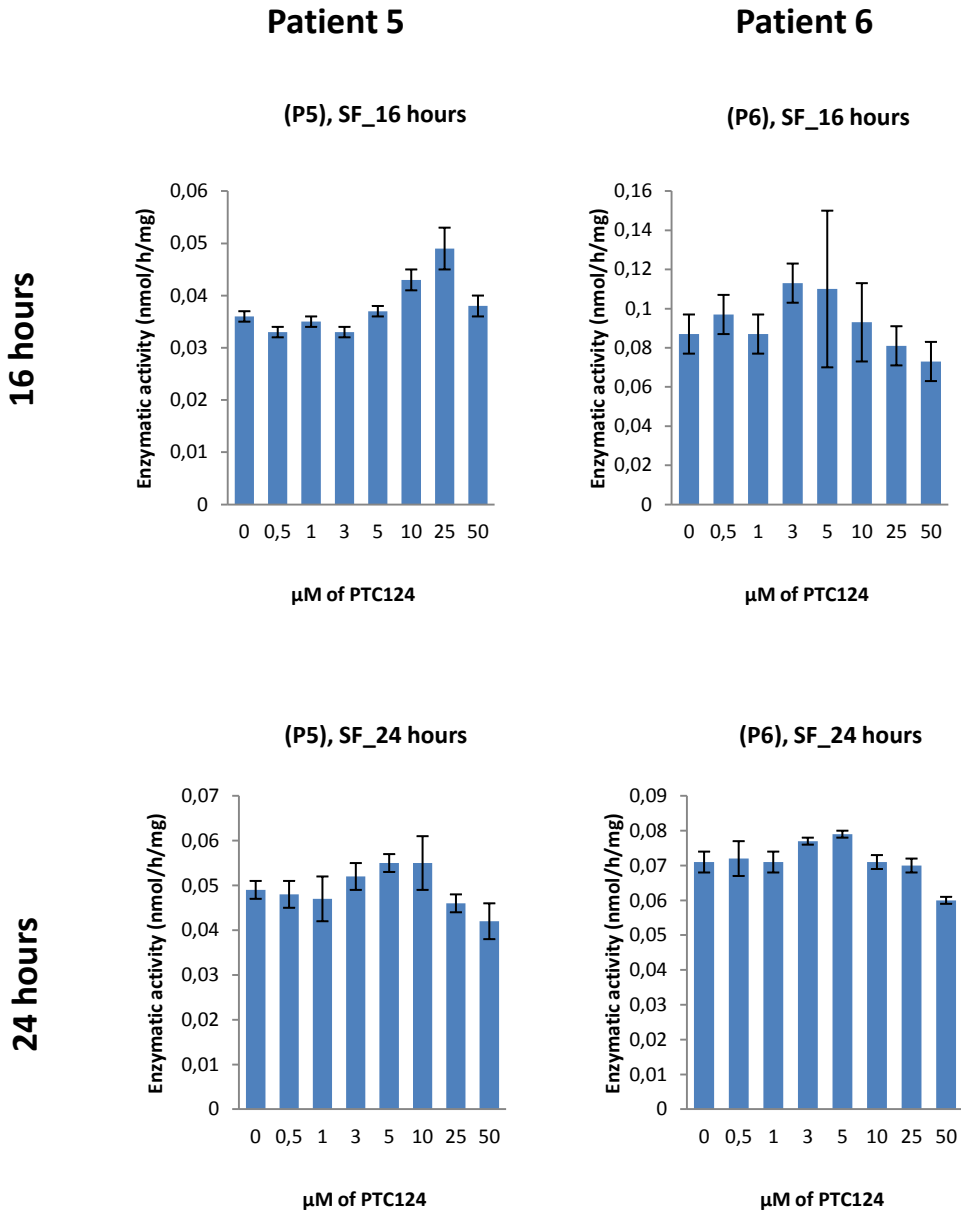

C

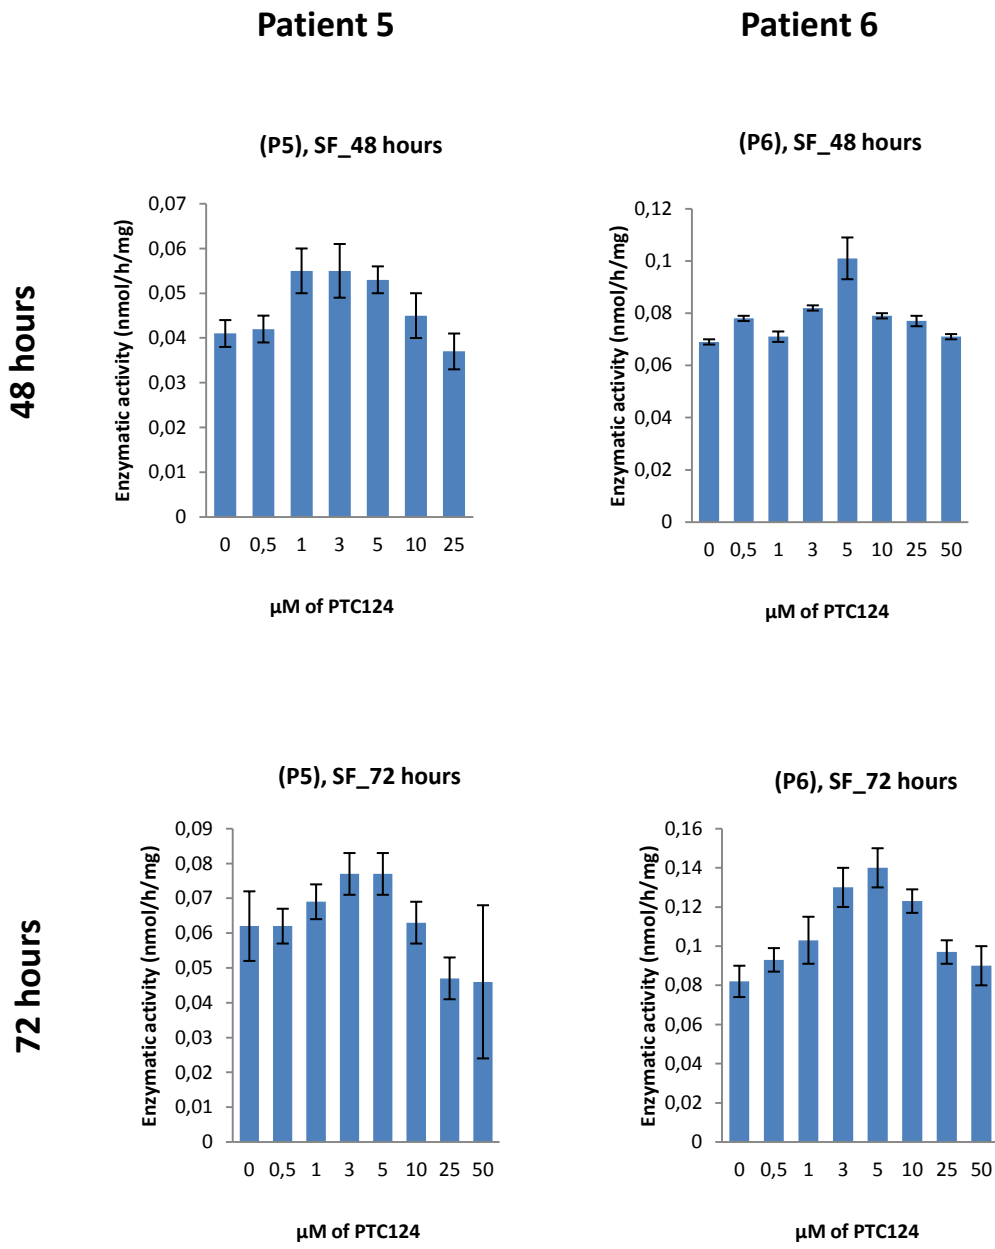

D

Patient 6

Control

24 hours

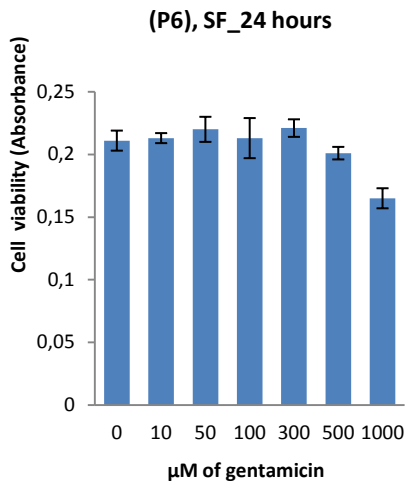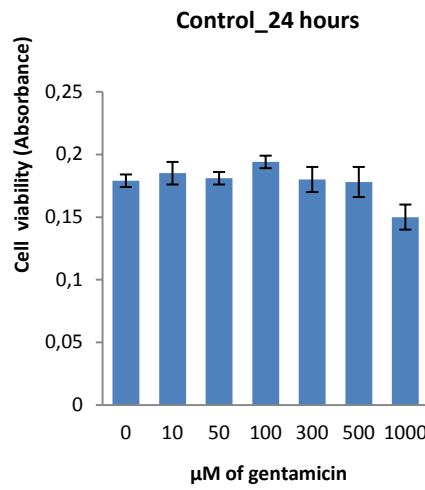

48 hours

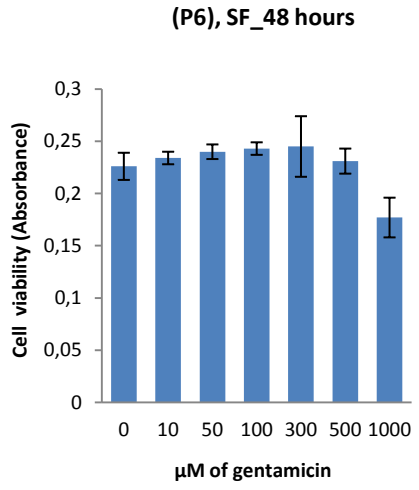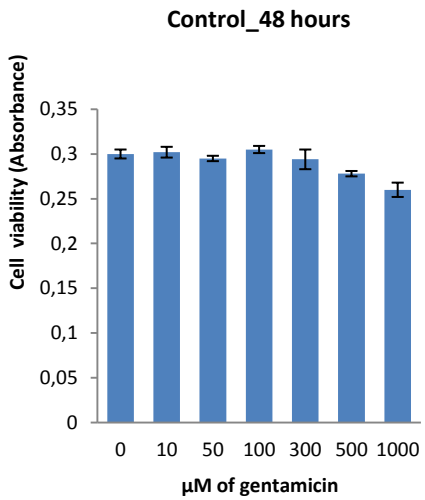

72 hours

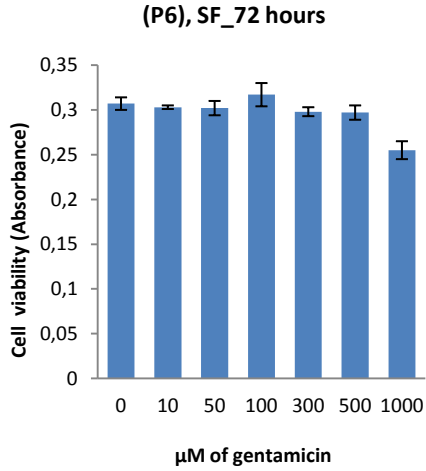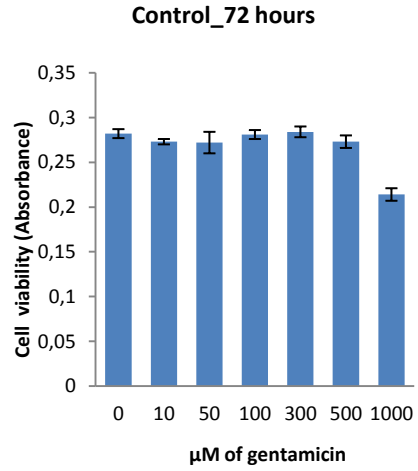

E

**Patient 6**

**Control**

**16 hours**

**(P6), SF\_16 hours**

**Control\_16 hours**

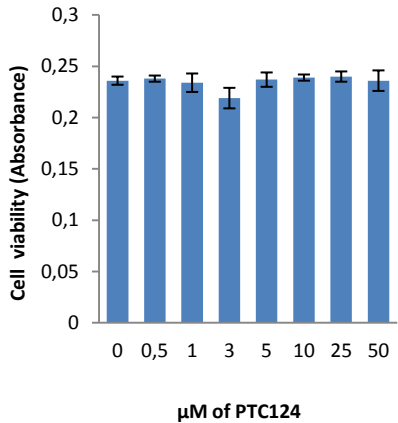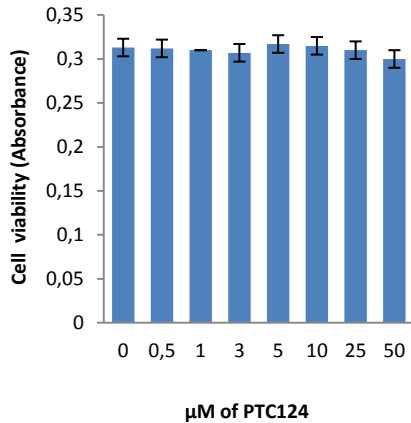

**24 hours**

**(P6), SF\_24 hours**

**Control\_24 hours**

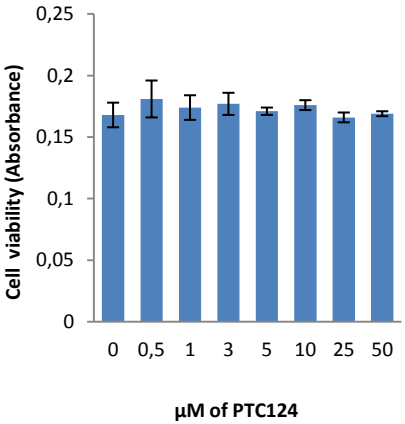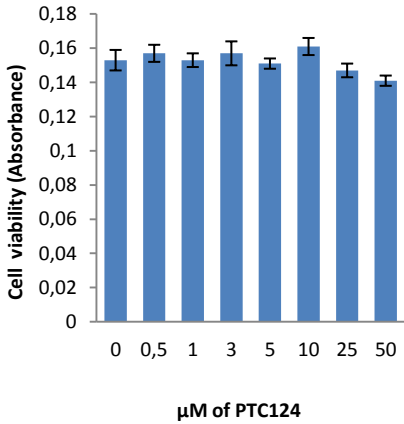

F

**Patient 6**

**Control**

**(P6), SF\_48 hours**

**Control\_48 hours**

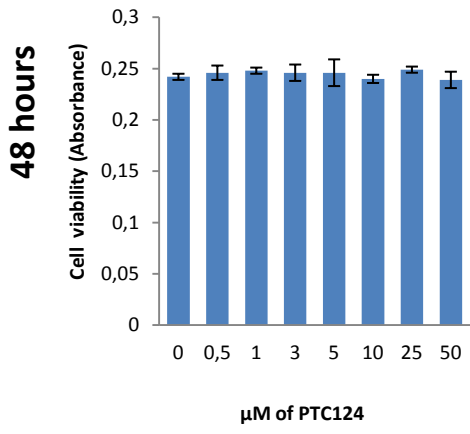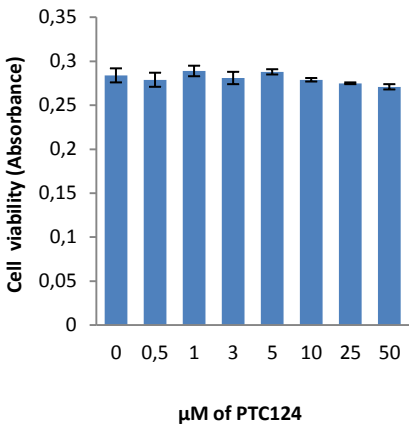

**(P6), SF\_72 hours**

**Control\_72 hours**

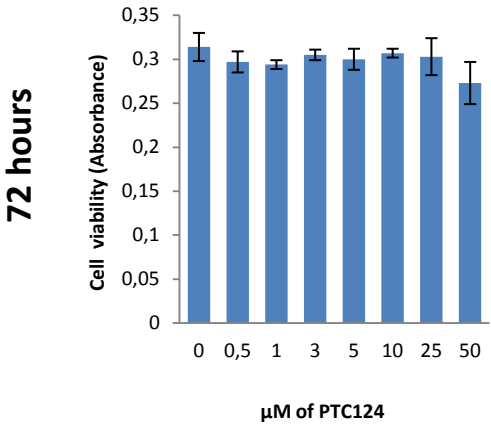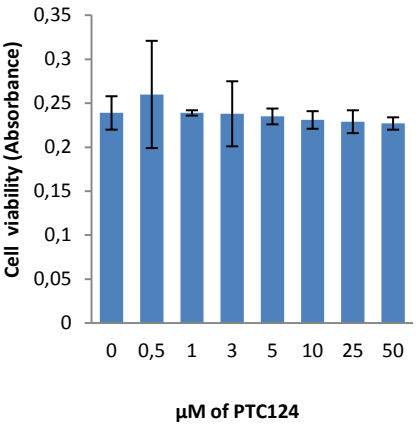

Supplement: 13311_2015_368_MOESM2_ESM.pdf [file 13311_2015_368_MOESM2_ESM.pdf]
